# Supplementary material
Source: MDPI journal article supplement (https://www.mdpi.com/2073-4441/14/23/3828)
Supplement: s1 [file s1]

Archive with 2 entries (2 files):
- Supplementary 1-Formatted.pdf
- Supplementary 2-Formatted.pdf
