# Supplementary material
Source: MDPI journal article supplement (https://www.mdpi.com/2073-4441/14/23/3828)
Supplement: s1 [file s1]

## Supplementary Material 2 - Summary of equations

This document summarizes all 33 equations that are developed in the paper. With no additional explanations, direct understanding and comparisons may be easier.

### Water consumption in rooms

General water demand in rooms:

$$WD_R(\text{L/room/day}) = N_G \left[ \sum_i (Q_i \cdot t_i) + \sum_j (V_j \cdot n_j) \right] \quad (1)$$

where:

$WD_R$  is the average water demand per room (L/room/day);

$N_G$  is the average number of occupants per occupied room in the hotel. It is calculated by dividing the total number of hotel guests by the total number of occupied rooms. In general, it can also be considered as a characteristic parameter of the hotel. For example, in urban business hotels,  $N_G$  might range between 1 and 1.5, while in holiday resorts, it can be as high as 2.5 or 3;

$i$  stands for each appliance of flow rate-based type;

$Q_i$  is the average flowrate for each appliance  $i$  (L/min);

$t_i$  is the average time each appliance  $i$  is used per day (min/guest/room/day);

$j$  stands for each appliance of volume-based type;

$V_j$  is the average volume per use for each appliance  $j$  (L/use);

$n_j$  is the average number of uses per day for each appliance  $j$  (uses/guest/room/day).

Assessed minimum water demand in rooms:

$$WD_{R_{\text{Min}}}(\text{L/room/day}) = N_G [(5.68 \cdot 4.5 + 7.57 \cdot 8) + (4.85 \cdot 4)] = N_G \cdot 105.5 \quad (2)$$

Minimum consumption benchmark for hotel rooms:

$$MCB_R(\text{m}^3/\text{year}) = 38.5 \cdot N_G \cdot N_R \cdot \text{Occ}_{\text{Hotel}} \quad (3)$$

where:

$N_R$  is total number of hotel rooms;

$\text{Occ}_{\text{Hotel}}$  is the occupancy rate of hotel rooms;

### Water consumption in kitchens/restaurants

General water demand in kitchens/restaurants:

$$WD_K(\text{L/restaurant/day}) = C_{\text{meal}} \cdot N_{\text{meals}} \quad (4)$$

where:

$WD_K$  is the average water demand per restaurant (L/restaurant/day);

$C_{\text{meal}}$  is the average water consumption per meal served (L/meal);

$N_{\text{meals}}$  is the total number of meals served (meals/restaurant/day).

Assessed minimum water demand in kitchens/restaurants:

$$WD_{K_{\text{Min}}}(\text{L/restaurant/day}) = 12 \cdot N_{\text{meals}} \quad (5)$$

Assuming that there is (only) one kitchen/restaurant in the hotel:

$$N_{\text{meals}}(\text{meals/day}) = N_G \cdot N_R \cdot \text{Occ}_{\text{Hotel}} \cdot (K_{\text{break}} + K_{\text{lunch}} + K_{\text{dinner}}) \quad (6)$$

where:

$K_{\text{break}}$ ,  $K_{\text{lunch}}$ , and  $K_{\text{dinner}}$  are the coefficients for breakfast, lunch, and dinner, respectively.

Therefore:

$$\text{WD}_{K_{\text{Min}}}(\text{L/day}) = 12 \cdot N_G \cdot N_R \cdot \text{Occ}_{\text{Hotel}} \cdot (K_{\text{break}} + K_{\text{lunch}} + K_{\text{dinner}}) \quad (7)$$

Minimum consumption benchmark in kitchens/restaurants:

$$\text{MCB}_K(\text{m}^3/\text{year}) = 4.38 \cdot N_G \cdot N_R \cdot \text{Occ}_{\text{Hotel}} \cdot (K_{\text{break}} + K_{\text{lunch}} + K_{\text{dinner}}) \quad (8)$$

### Water consumption in outdoor irrigation

General water demand in outdoor irrigation:

$$\text{WD}_I(\text{L/garden/year}) = \text{ET}_0 \cdot A \cdot \text{PF} \cdot \frac{1}{K_r} \cdot K_t \quad (9)$$

where:

$\text{WD}_I$  is the irrigation water demand in a garden area (L/garden/year);

$\text{ET}_0$  is the evapotranspiration reference value at the geographical hotel location (mm/year);

$A$  is the garden area ( $\text{m}^2$ );

$\text{PF}$  is the plant factor for plant type;

$K_t$  is the efficiency of gardening techniques;

$K_r$  is the efficiency of the irrigation system.

Assessed minimum water demand in outdoor:

$$\text{WD}_{I_{\text{Min}}}(\text{L/garden/year}) = \text{ET}_0 \cdot A \cdot \text{PF} \quad (10)$$

**Table S2-1 (Table 9).** Values of  $\text{MCB}_I$  for different climate types and types of plants.

| Climate Type          | $\text{ET}_0$ (mm/Year) | $\text{PF}_i$ | $\text{MCB}_I$ ( $\text{m}^3/\text{Year}$ ) |      |
|-----------------------|-------------------------|---------------|---------------------------------------------|------|
| Temperate regions     | 700                     | 0.7           | $0.490 \cdot \sum_i (A_i)$                  | (11) |
| Mild Mediterranean    | 1250                    | 0.6           | $0.750 \cdot \sum_i (A_i)$                  | (12) |
| Damp tropical regions | 1750                    | 0.5           | $0.875 \cdot \sum_i (A_i)$                  | (13) |

### Water consumption in laundry

General water demand in laundry:

$$WD_L(\text{L/laundry/day}) = C_W \cdot N_C \quad (14)$$

where:

$WD_L$  is the laundry water demand (L/laundry/day);

$C_W$  is the washer consumption factor (L/kg);

$N_C$  is the amount of clothes per guest that should be washed daily (kg/laundry/day).

Assessed minimum water demand in laundry:

$$WD_{L_{\text{Min}}}(\text{L/laundry/day}) = 5 \cdot N_C \quad (15)$$

Assuming that there is (only) one laundry in the hotel:

$$N_C(\text{kg/day}) = N_G \cdot N_R \cdot \text{Occ}_{\text{Hotel}} \cdot (N_{C_R} + N_{C_K}) \quad (116)$$

where:

$N_G$ ,  $N_R$ , and  $\text{Occ}_{\text{Hotel}}$  are the same variables already explained;

$N_{C_R}$  is the amount of clothes per guest in rooms (kg/guest/day);

$N_{C_K}$  is the amount of clothes per guest in kitchen-restaurant (kg/guest/day).

Assessment of average clothes use per guest:

$$N_C(\text{kg/day}) = N_G \cdot N_R \cdot \text{Occ}_{\text{Hotel}} \cdot (1.46 + 0.32 \cdot (K_{\text{break}} + K_{\text{lunch}} + K_{\text{dinner}})) \quad (17)$$

Therefore,

$$WD_{L_{\text{Min}}}(\text{L/day}) = 5 \cdot N_G \cdot N_R \cdot \text{Occ}_{\text{Hotel}} \cdot (1.46 + 0.32 \cdot (K_{\text{break}} + K_{\text{lunch}} + K_{\text{dinner}})) \quad (18)$$

Minimum consumption benchmark for laundry:

$$MCB_L(\text{m}^3/\text{year}) = N_G \cdot N_R \cdot \text{Occ}_{\text{Hotel}} \cdot (2.67 + 0.59 \cdot (K_{\text{break}} + K_{\text{lunch}} + K_{\text{dinner}})) \quad (19)$$

### Water consumption in swimming-pools

General water demand in swimming-pools:

$$WD_P = WD_{\text{Evap}} + WD_{\text{Maint}} + WD_{\text{Swimmers}} \quad (20)$$

where:

$WD_P$  is the swimming pool's total water demand;

$WD_{\text{Evap}}$  is the water losses evaporation in a swimming pool;

$WD_{\text{Maint}}$  is the water used in filters backwashing;

$WD_{\text{Swimmers}}$  is the water consumption due to swimmers' activity.

Water demand due to evaporation:

$$WD_{\text{Evap}}(\text{L/pool/day}) = 15 \cdot 24 \cdot A_p \cdot F_a \cdot (p_w - p_a) \quad (21)$$

where:

$A_p$  is the pool surface area (m<sup>2</sup>);

$F_a$  is the activity factor, which depends on the type of pool;

$p_w$  is the saturation vapour pressure taken at the temperature of water at its surface (bar);

$p_a$  is the saturation pressure at ambient air dew point (bar).

Water demand due to regular maintenance:

$$WD_{\text{Maint}}(\text{L/pool/day}) = \frac{4 \cdot 1000}{365} \cdot V_p = 11 \cdot V_p \quad (22)$$

where:

$V_p$  is the pool volume ( $\text{m}^3$ ).

Water demand due to swimmers' activity:

$$WD_{\text{Swimmers}}(\text{L/pool/day}) = C_s \cdot N_s \quad (23)$$

where:

$C_s$  is unitary water consumption per swimmer (L/day/swimmer);

$N_s$  is the number of swimmers in the swimming pool.

Assessed minimum water demand in swimming-pools:

$$WD_{P_{\text{Min}}}(\text{L/pool/day}) = 7.4 \cdot A_p + 11 \cdot 1.5 \cdot A_p + 40 \cdot N_s \quad (24)$$

Minimum consumption benchmark in swimming-pools:

$$MCB_P(\text{m}^3/\text{year}) = 0.365 \cdot (23.9 \cdot A_p + 40 \cdot N_s) \cdot \text{Pool}_{\text{Open}} \quad (25)$$

where:

$\text{Pool}_{\text{Open}}$  is the percentage of annual pool open days

### Water consumption in air conditioning

General water demand for air conditioning:

$$WD_{\text{AC}} = WD_{\text{ACOccupied rooms}} + WD_{\text{ACCommon areas}} \quad (26)$$

Water demand for air conditioning in occupied rooms:

$$WD_{\text{ACOccupied rooms}}(\text{L/AC system/day}) = C_{\text{AC}} \cdot N_R \cdot \text{Occ}_{\text{Hotel}} \quad (27)$$

where:

$WD_{\text{ACOccupied Rooms}}$  is the water consumption of the air conditioning system for occupied rooms (L/AC system/day);

$C_{\text{AC}}$  is the unit water consumption per room of the air conditioning system (L/room/day).

Water demand for air conditioning in common areas:

$$WD_{\text{ACCommon areas}}(\text{L/AC system/day}) = 0.15 \cdot C_{\text{AC}} \cdot N_R \quad (28)$$

Assuming that there is (only) one air conditioning system in the hotel:

$$WD_{\text{AC}}(\text{L/day}) = C_{\text{AC}} \cdot N_R \cdot (\text{Occ}_{\text{Hotel}} + 0.15) \quad (29)$$

Assessed minimum water demand for air conditioning:

$$WD_{\text{ACMin}}(\text{L/day}) = 25 \cdot N_R \cdot (\text{Occ}_{\text{Hotel}} + 0.15) \quad (30)$$

Minimum consumption benchmark for air conditioning:

$$MCB_{\text{AC}}(\text{m}^3/\text{year}) = 9.13 \cdot N_R \cdot (\text{Occ}_{\text{Hotel}} + 0.15) \quad (31)$$

**The Hotel Water Consumption Index (HWCI)**

General minimum consumption benchmark for the whole hotel:

$$MCB \text{ (m}^3\text{/year)} = MCB_R + MCB_K + MCB_I + MCB_L + MCB_P + MCB_{AC} \quad (32)$$

Final calculation of the HWCI:

$$HWCI = \frac{\text{Current annual water consumption (m}^3\text{/year)}}{MCB \text{ (m}^3\text{/year)}} \quad (33)$$
